# Supplementary material for: Long noncoding RNA ZFAS1 enhances adriamycin resistance in pediatric acute myeloid leukemia through the miR-195/Myb axis
Source: Royal Society of Chemistry journal article supplement (doi:10.1039/c9ra04843j), 2019-01-01

**Supplement Figure 1.** The expression levels of MRP1 and MDR1 were increased in BM samples of pediatric AML patients after treatment with ADR-based chemotherapy.

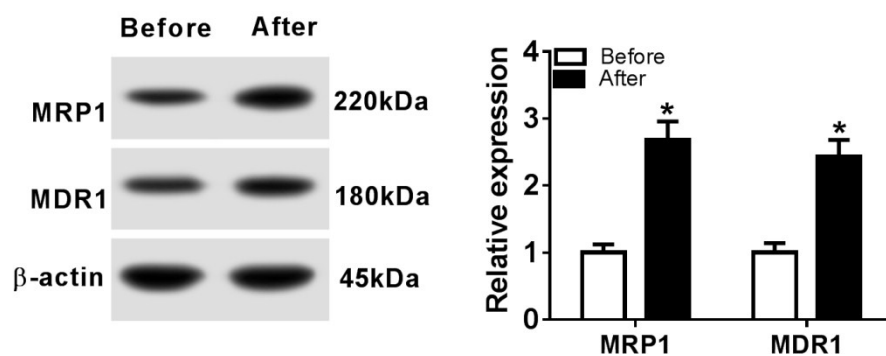

**Supplement Figure 2.** The apoptotic rate of transfected cells by flow cytometry. (A) The apoptotic rate of Figure 4E using flow cytometry. (B) The apoptotic rate of Figure 6E by flow cytometry.

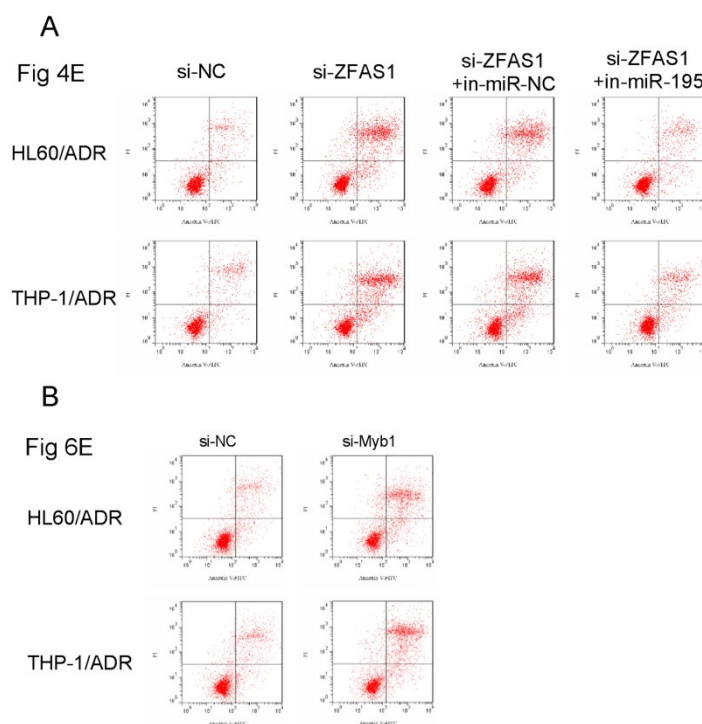

Supplement: c9ra04843j1.pdf [file c9ra04843j1.pdf]
